# Supplementary material for: A 3D-printed pre-filter with a crystal violet–gold nanocluster hybrid for a reusable visible-light-activated antimicrobial air filtration system
Source: Royal Society of Chemistry journal article supplement (doi:10.1039/d5qi02008e), 2025-11-18
Supplement: d5qi02008e1.pdf [file d5qi02008e1.pdf]

## **Supplementary Information**

### **3D-Printed Pre-filter with Crystal Violet–Gold Nanocluster Hybrid for Reusable Visible-Light- Activated Antimicrobial Air Filtration**

*Jae Hak Shin<sup>1,†</sup>, So Yeong Kim<sup>2,†</sup>, Hyun Sung Kang<sup>2</sup>, In Ho Kim<sup>1</sup>, Joon Young Park<sup>1</sup>, Ki Joon Heo<sup>2,\*</sup>, Gi Byoung Hwang<sup>3,4,\*</sup>, Jae Hee Jung<sup>1,5\*</sup>*

<sup>1</sup> Department of Mechanical Engineering, Sejong University, Seoul 05006, Republic of Korea

<sup>2</sup> School of Mechanical Engineering, Chonnam National University, Gwangju 61186, Republic of Korea

<sup>3</sup> Department of Chemistry, University College London, London, WC1H 0AJ, United Kingdom

<sup>4</sup> Lab.M.0, Seoul 04799, Republic of Korea

<sup>5</sup> Department of Aerospace System Engineering, Sejong University, Seoul 05006, Republic of Korea

<sup>†</sup> These authors contributed equally to this work.

<sup>\*</sup> Corresponding authors

E-mail address: [k.heo@jnu.ac.kr](mailto:k.heo@jnu.ac.kr) (Ki Joon Heo), [gi-byoung.hwang.14@ucl.ac.uk](mailto:gi-byoung.hwang.14@ucl.ac.uk) (Gi Byoung Hwang), [jaehee@sejong.ac.kr](mailto:jaehee@sejong.ac.kr) (Jae Hee Jung)

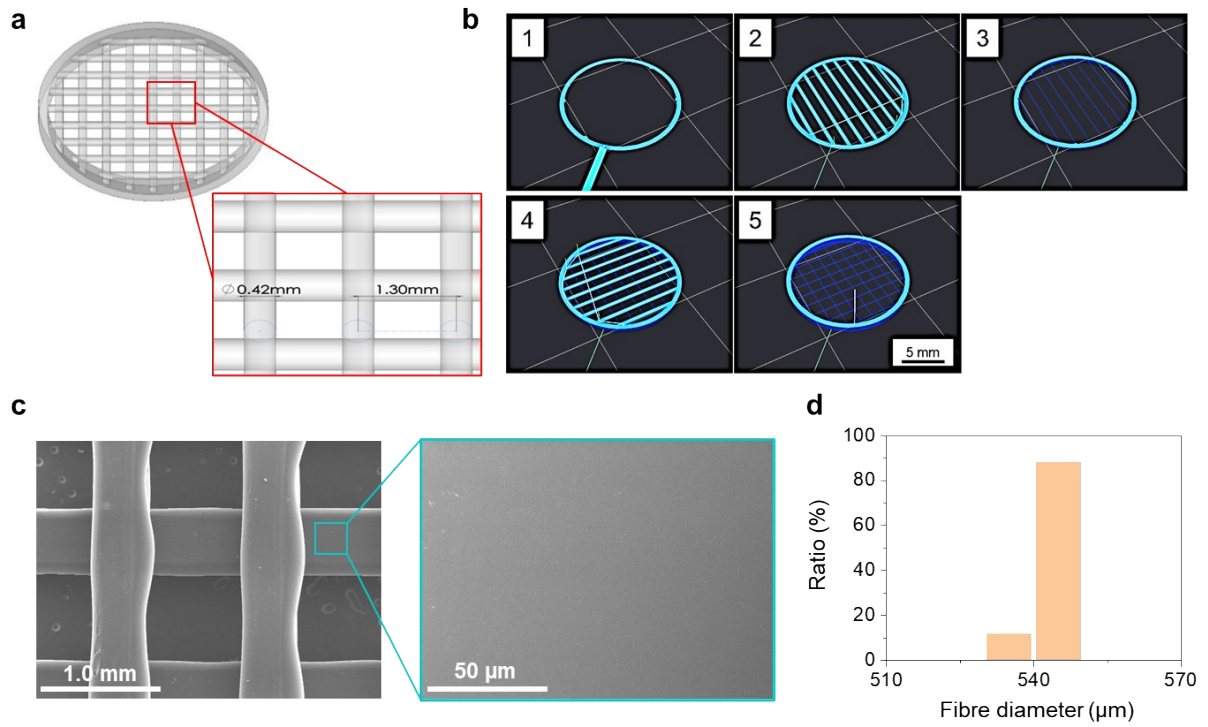

**Figure S1.** (a) CAD schematic of the pre-filter. (b) Simulated 3D printing path illustrating the layer-by-layer deposition sequence of the pre-filter. (c) SEM image of the printed pre-filter. (d) Distribution of fibre diameter through microscopic image analysis of the manufactured TPU pre-filter.

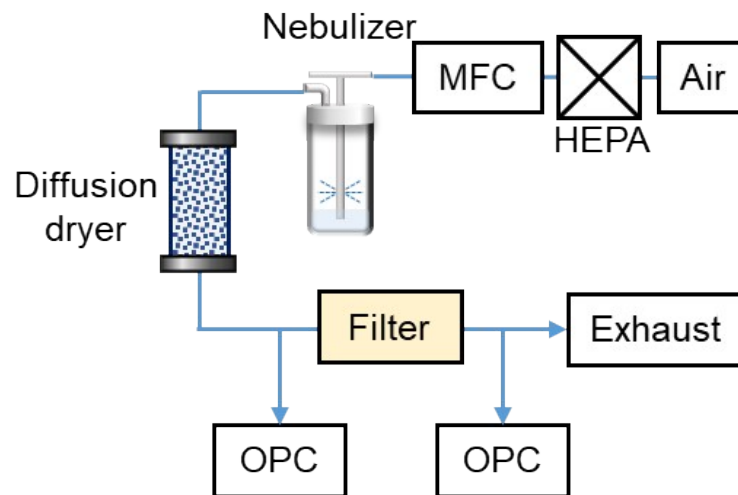

**Figure S2.** Experimental setup for filtration performance test using *S. epidermidis* bioaerosols.

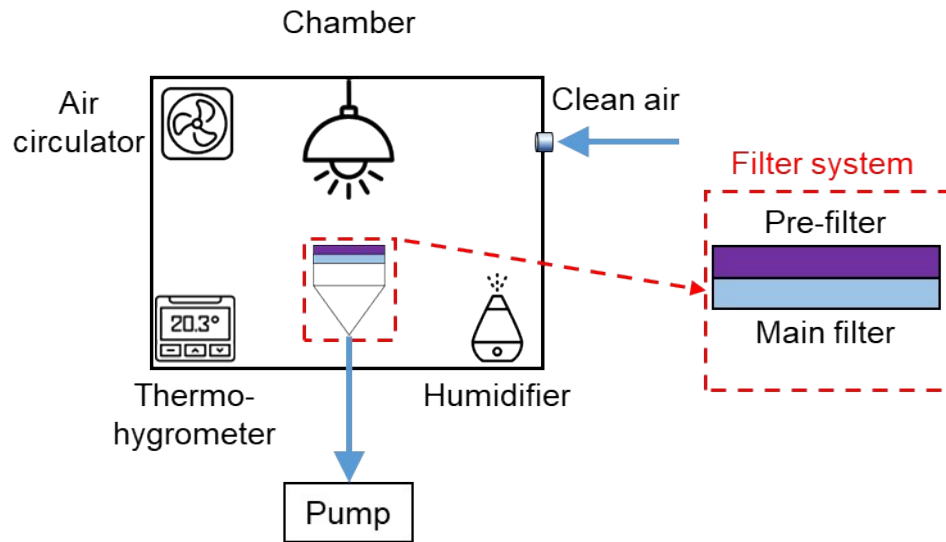

**Figure S3.** Schematic illustration of airflow-assisted antibacterial testing setup of antimicrobial air filter system under various face velocities.

42

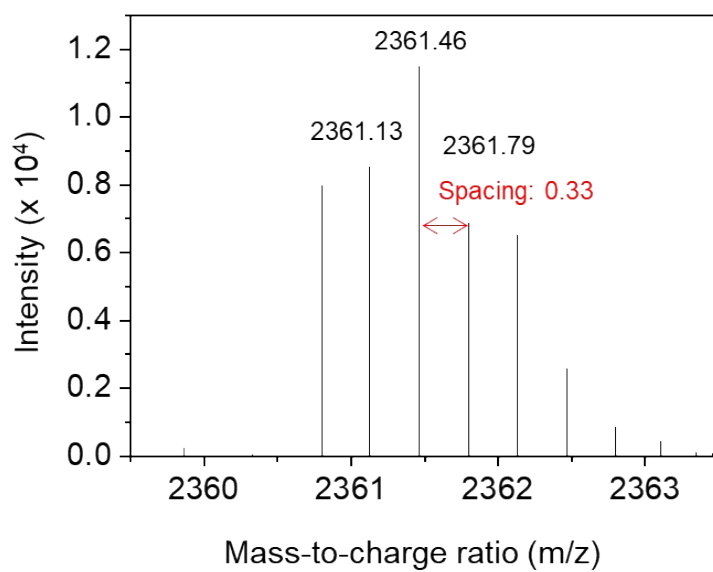

43

44 **Figure S4.** Enlarged experimental isotope pattern of peak #1 in Figure 2c showing 0.33 spacing  
45 between <sup>12</sup>C and <sup>13</sup>C.

46

47

**Table S1.** Theoretical and experimental characteristic peak positions of  $[\text{Au}_{25}(\text{Cys})_{18}]$  under ESI-MS, with corresponding empirical formulations of gas-phase ions.

| Peak number | Characteristic peak position (m/z) |              | Empirical formulations of gas-phase ions formed under ESI | Exact mass (Da) |
|-------------|------------------------------------|--------------|-----------------------------------------------------------|-----------------|
|             | Theoretical                        | Experimental |                                                           |                 |
| #1          | 2361.43                            | 2361.46      | $[\text{Au}_{25}(\text{Cys})_{18}\text{-3H}^+]^{3-}$      | 7084.38         |
| #2          | 2368.08                            | 2368.13      | $[\text{Au}_{25}(\text{Cys})_{18}\text{-4H+Na}]^{3-}$     | 7104.39         |
| #3          | 2375.44                            | 2376.12      | $[\text{Au}_{25}(\text{Cys})_{18}\text{-5H+2Na}]^{3-}$    | 7128.36         |
| #4          | 2382.74                            | 2382.75      | $[\text{Au}_{25}(\text{Cys})_{18}\text{-6H+3Na}]^{3-}$    | 7148.25         |
| #5          | 2390.08                            | 2390.46      | $[\text{Au}_{25}(\text{Cys})_{18}\text{-7H+4Na}]^{3-}$    | 7171.38         |
| #6          | 2397.42                            | 2397.31      | $[\text{Au}_{25}(\text{Cys})_{18}\text{-8H+5Na}]^{3-}$    | 7191.93         |

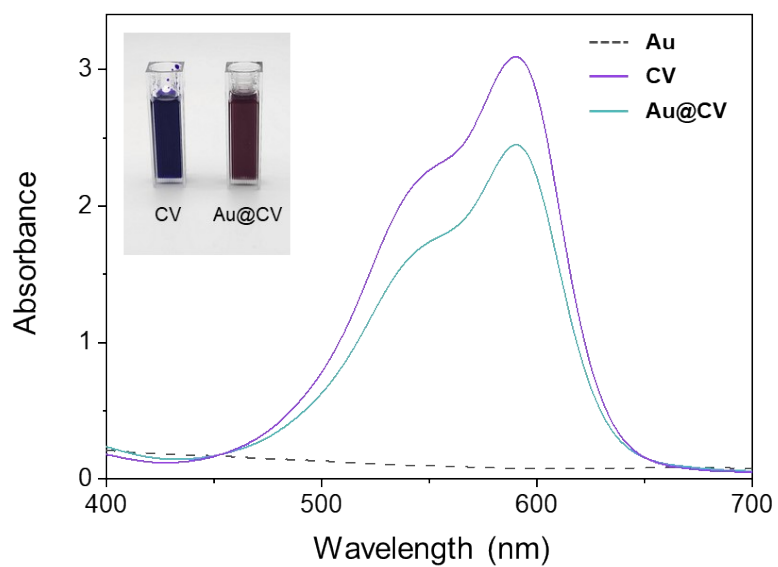

UV-vis absorbance spectra of only Au, only CV, and Au@CV-coated TPU film

**Figure S5.** UV-vis absorbance spectra of TPU pre-filters coated with Au, CV, and Au@CV. Inset: digital images of CV and Au@CV solutions.

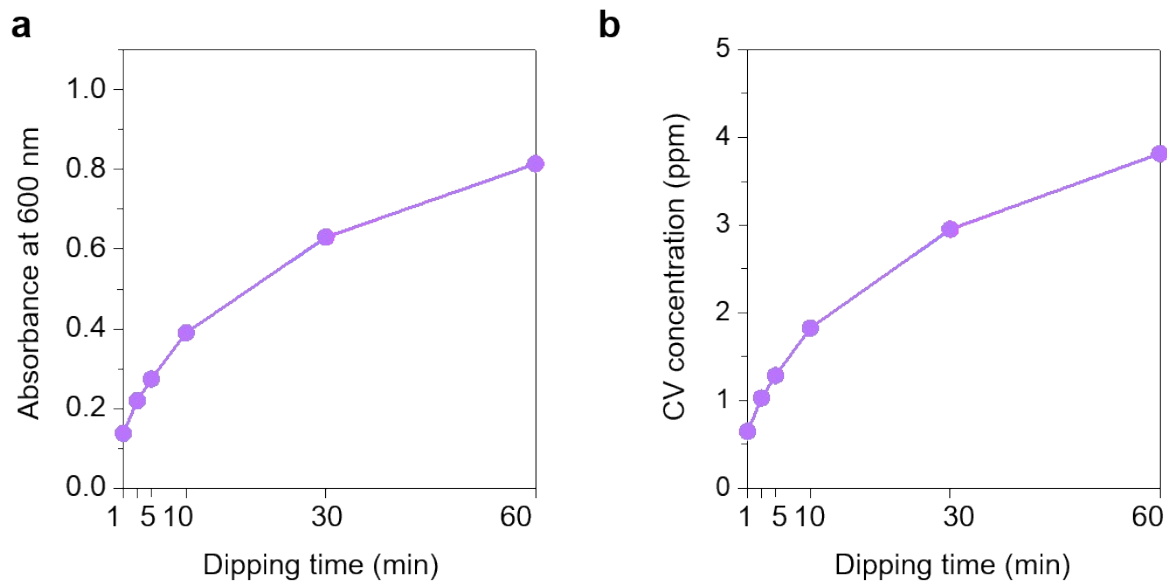

**Figure S6.** (a) Absorbance at 600 nm of Au@CV-coated TPU film as a function of coating time. (b) The total coating amount (ppm) of CV determined from UV-vis calibration. For this measurement, a flat TPU film with the same polymer composition was used instead of the porous pre-filter employed in the paper.



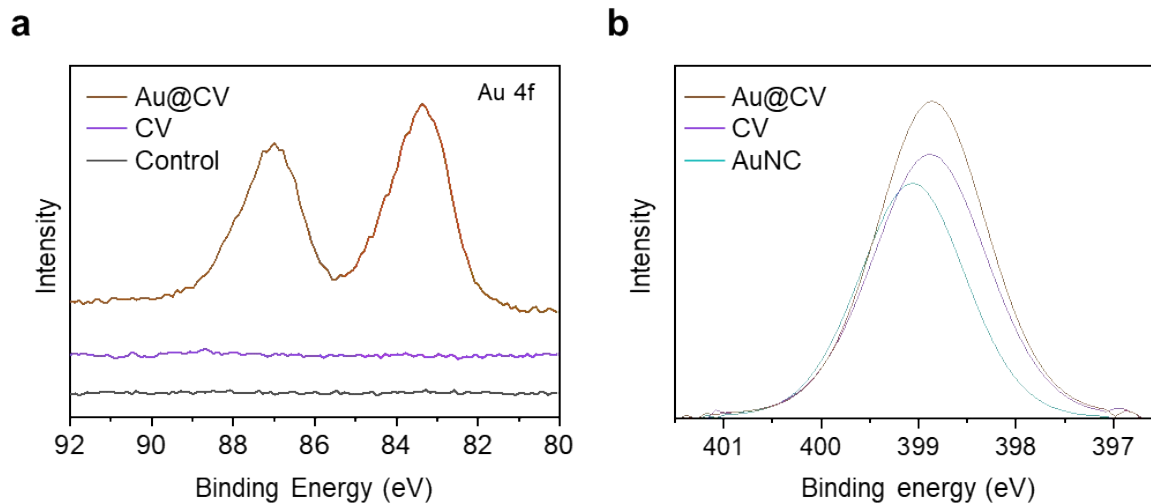

**Figure S7.** (a) XPS Au 4f spectra of control, CV-coated, and Au@CV-coated pre-filters. (b) N 1s spectra of CV only, AuNC only, and Au@CV filter. The C 1s peak at 285.8 eV was used as the internal energy reference.

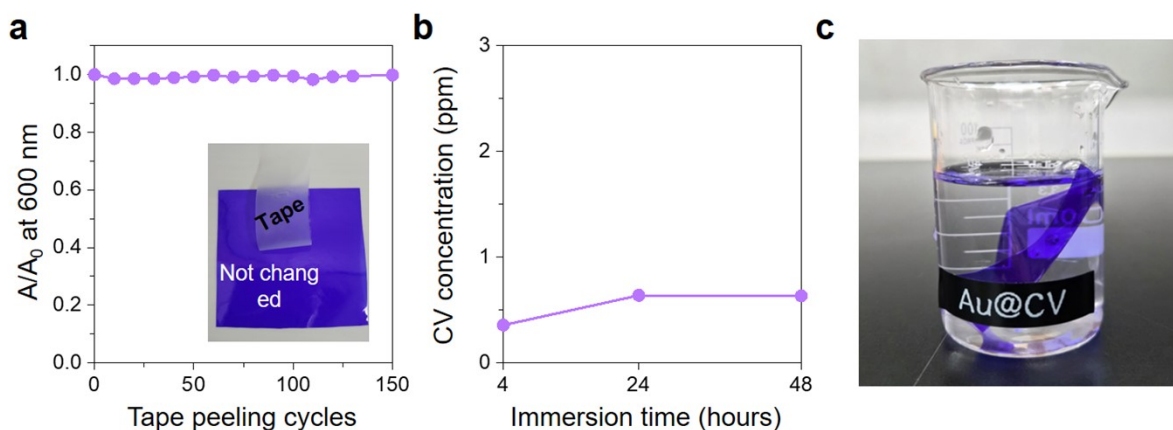

66

67 **Figure S8.** (a) Adhesive tape peeling test of the Au@CV-coated film (coating time: 24 h). A new piece  
 68 of Sellotape was applied and removed for each peeling cycle. A and  $A_0$  represent the absorbance at  
 69 600 nm after peeling (A) and before peeling (initial,  $A_0$ ), respectively. (b) Leaching of CV from the  
 70 Au@CV surface. The Au@CV films were cut into 3 x 3 cm portions and dipped into deionized water for  
 71 48 hours. (c) Photograph of the Au@CV-coated TPU film immersed in deionized water.

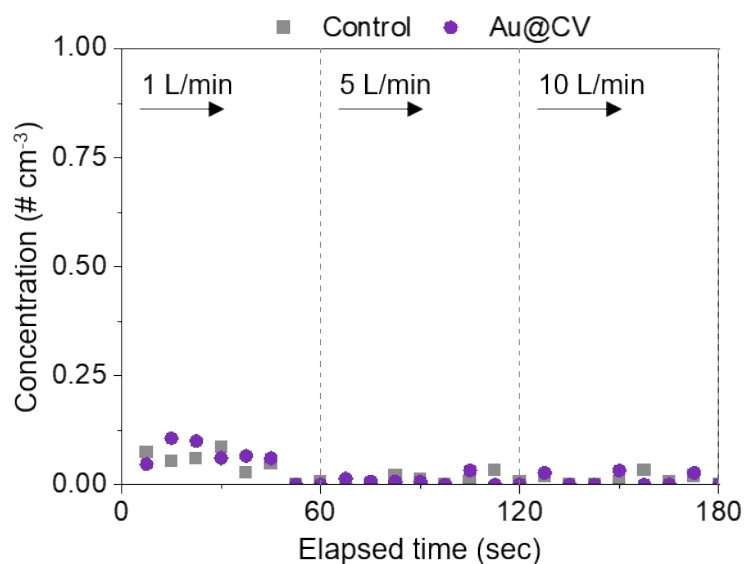

72

73 **Figure S9.** The particle number concentration was measured downstream of the control and Au@CV  
 74 pre-filter at various flow rates. We examine the possible surface detachment or structural degradation  
 75 of the Au@CV filter under airflow conditions. The residual particles released from the Au@CV pre-filter  
 76 were measured using a condensation particle counter (CPC, Model 3750, TSI Inc.), which can detect  
 77 particles larger than 7 nm. The Au@CV pre-filter was mounted in a sealed filter holder, and particle  
 78 number concentrations downstream of the filter were continuously monitored under clean-air flow. The  
 79 background signal from an empty filter holder (Control) was recorded under identical conditions for  
 80 comparison.

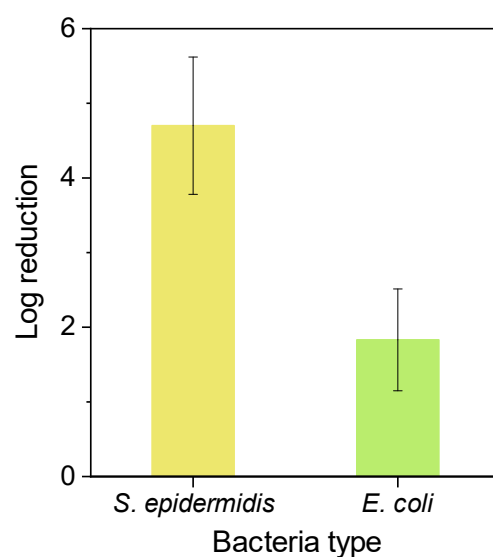

81  
82 **Figure S10.** Photobactericidal activity against Gram-positive (*S. epidermidis*) and Gram-negative (*E.*  
83 *coli*) bacteria at 11.9 mW cm<sup>-2</sup> for 3 h.

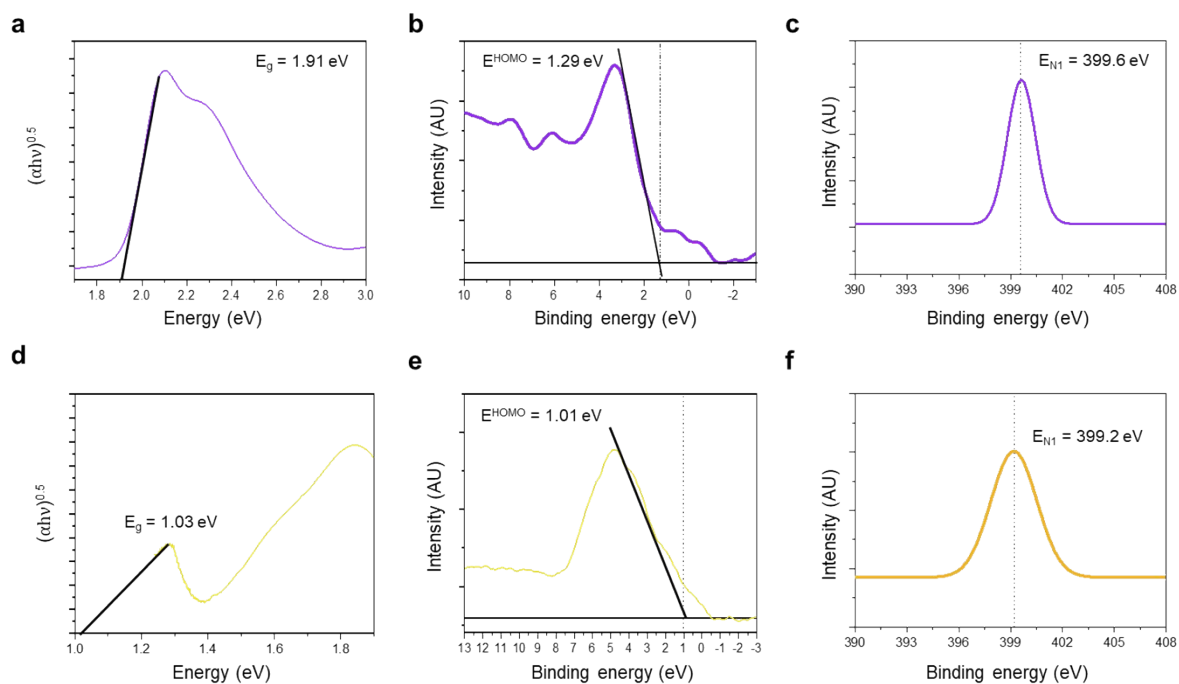

84

85 **Figure S11.** (a) Band gap, (b) HOMO band, and (c) N 1s spectra for CV. (d) Band gap, (e) HOMO band,  
86 and (f) N 1s spectra for AuNC.

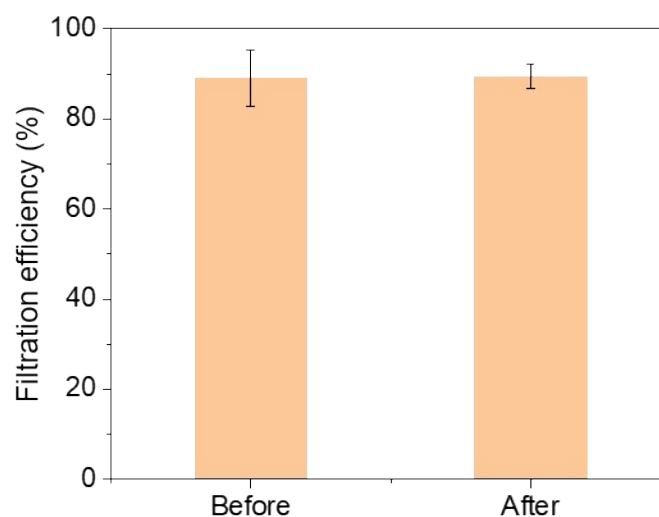

87

88 **Figure S12.** The filtration efficiency of the main filter measured before and after continuous exposure  
 89 to ROS from the Au@CV pre-filter.

90 To evaluate the effect of ROS exposure on the main filter performance, the same experimental setup  
 91 as in the airflow-assisted antibacterial test ([Figure S3](#)) was employed. The filter was irradiated with  
 92 visible light for 3 h under continuous airflow ( $2.4 \text{ cm s}^{-1}$ ), and the filtration efficiency of the main filter  
 93 was measured before and after exposure using an optical particle counter.
